# Supplementary material for: An Image Processing Protocol to Extract Variables Predictive of Human Embryo Fitness for Assisted Reproduction
Source: MDPI journal article supplement (doi:10.3390/app12073531), 2022-03-30
Supplement: s1 [file s1]

Archive with 1 entries (1 files):
- applsci-1636741-supplementary.pdf
